# Supplementary material
Source: Springer Nature journal article supplement (https://www.springermedizin.de/resource/supplementary/12943_2013_1358_MOESM4_ESM.pdf/9552796)
Supplement: MOESM4 [file 9552796]

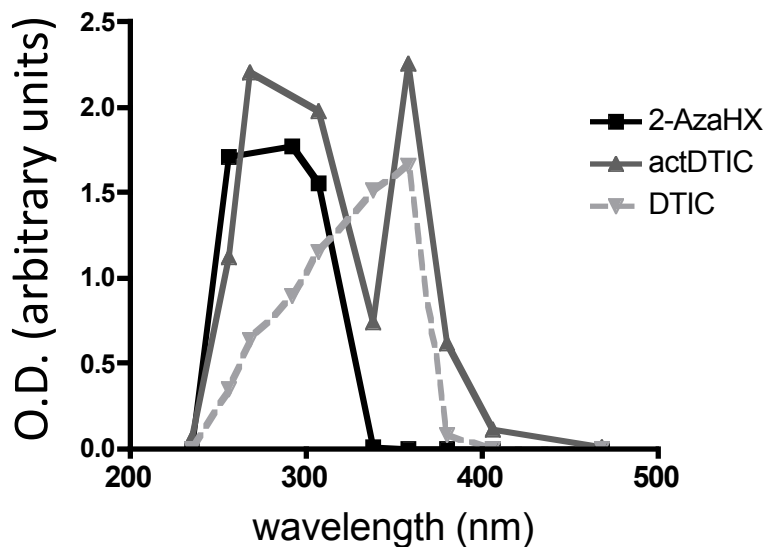

**Supplemental Figure 2. 2-Azahypoxanthine and light activated DTIC show similar UV absorbance profiles.** The absorption profiles for 0.05mM 2-AzaHypoxanthine and 0.1mM light activated DTIC were obtained using an ultra low volume spectro-photometer (NanodropND1000, Lab Tech). Light exposed DTIC shows a UV absorption profile (dark-gray line) with two peaks of maximal absorption. One at 350-370nm (overlapping the UV spectrum for non activated DTIC, dashed light-gray line) and one at 256-295nm overlapping the UV absorption profile corresponding to 2-Azahypoxanthine (black line).
